# Supplementary material
Source: PubMed Central journal article supplement (PMC10281817)
Supplement: NIHMS1906140-supplement-supplement.pdf [file NIHMS1906140-supplement-supplement.pdf]

**Supplemental Table 1. List of covariates considered in the multivariable models for adult heart**

| <b>Covariate</b>                                                               | <b>1-year mortality model</b> | <b>5-year mortality model conditional on survival to 1 year</b> |
|--------------------------------------------------------------------------------|-------------------------------|-----------------------------------------------------------------|
| Recipient age (years) (continuous)                                             | x                             | x                                                               |
| Recipient BMI (kg/m <sup>2</sup> ) (continuous)                                | x                             | x                                                               |
| Recipient diagnosis (HCM, amyloid, sarcoid, radiation/chemo, other RCM)        | x                             | x                                                               |
| Recipient diabetes (no, yes)                                                   | x                             | x                                                               |
| Recipient dialysis (no, yes)                                                   | x                             | -                                                               |
| Recipient history cancer (no, yes)                                             | x                             | x                                                               |
| Recipient IV inotropes (no, yes)                                               | x                             | x                                                               |
| Recipient IABP (no, yes)                                                       | x                             | x                                                               |
| Recipient ventilator (no, yes)                                                 | x                             | -                                                               |
| Recipient hospitalized (no, yes)                                               | x                             | x                                                               |
| Recipient previous cardiac surgery (no, yes)                                   | x                             | x                                                               |
| Recipient PRA (%) (continuous)                                                 | x                             | x                                                               |
| Recipient GFR (mL/min/1.73 m <sup>2</sup> ) (continuous)                       | x                             | x                                                               |
| Recipient total bilirubin (mg/dl) (continuous)                                 | x                             | x                                                               |
| Recipient PA mean (mm/Hg) (continuous)                                         | x                             | x                                                               |
| Recipient PCW (mm/Hg) (continuous)                                             | x                             | x                                                               |
| Recipient PVR (wood units) (continuous)                                        | x                             | x                                                               |
| Donor age (years) (continuous)                                                 | x                             | x                                                               |
| Donor cause of death (head trauma, anoxia, CVA, other)                         | x                             | x                                                               |
| Donor/recipient sex match (male/male, female/male, male/female, female/female) | x                             | x                                                               |
| Donor/recipient CMV mismatch (no, yes)                                         | x                             | x                                                               |
| Ischemic time (hours) (continuous)                                             | x                             | x                                                               |
| Center volume in previous 3 years (continuous)                                 | x                             | x                                                               |
| Transplant era (1992-2004, 2005-2011, 2012-6/2017)                             | x                             | -                                                               |
| Transplant era (1992-2001, 2002-2007, 2008-6/2013)                             | -                             | x                                                               |
